# Supplementary material for: parSMURF, a high-performance computing tool for the genome-wide detection of pathogenic variants
Source: PubMed Central journal article supplement (PMC7244787; doi:10.1093/gigascience/giaa052), 2020-05-23
Supplement: giaa052_response_to_reviewer_comments_revision_3.pdf [file giaa052_response_to_reviewer_comments_revision_3.pdf]

## Author's Response To Reviewer Comments

Close

I insert the doi for my new GigaDB dataset ( <http://dx.doi.org/10.5524/100743> ) in reference nr. 56 of the bibliography.

Close
